# Supplementary material
Source: publisher figshare collection journal article supplement (https://rs.figshare.com/ndownloader/files/12303590)
Supplement: Supplementary file [file 12303590]

**A novel acid catalyst based on super/sub critical CO<sub>2</sub>-water for the efficient esterification of rosin**

**Dan Zhou<sup>1</sup>, Linlin Wang<sup>1,2,\*</sup>, Xiaopeng Chen<sup>1,2,\*</sup>, Xiaojie Wei<sup>1,2</sup>,**

**Jiezhen Liang<sup>1,2</sup>, Dong Zhang<sup>1</sup>, Guoxin Ding<sup>1</sup>**

*<sup>1</sup> School of Chemistry and Chemical Engineering, Guangxi University, Nanning 530004, PR China*

*<sup>2</sup> Guangxi Key Laboratory of Petrochemical Resources Processing and Process Intensification Technology, Guangxi University, Nanning 53004, PR China*

**Supplementary Material**

**Data processing**

**1. Conversion**

The conversion was calculated as follow.

$$\text{Conversion} = (1 - \frac{\text{the acid number of rosin glyceride}}{\text{the acid number of rosin}}) \times 100 \% \quad (1)$$

Technical-grade rosin has an acid value of 160.64 mg KOH/g. For an example, a final verification trial was performed based on the RSM optimization results, and the average acid value of 8.45 mgKOH/g was achieved, so the esterification rate was calculated as follow.

$$\text{Conversion} = 1 - 8.45/160.64 = 94.74\%$$

Similarly, we can calculate other values (**Table 1**).

---

\*Corresponding author. Tel.: +86-771-3272702; fax: +86-771-323-3718

E-mail address: [wanglinlin1971@sina.com](mailto:wanglinlin1971@sina.com) (L. Wang), [lilm@gxu.edu.cn](mailto:lilm@gxu.edu.cn) (X. Chen).

**Table 1** The effect of different catalysts on the severity of esterification of resin acid.

| product              | catalyst                             | The acid value<br>/(mgKOH/g) | conversion<br>/% |
|----------------------|--------------------------------------|------------------------------|------------------|
| rosin (raw material) | ——                                   | 160.64                       | ——               |
| rosin glyceride      | without catalyst                     | 66.54                        | 58.58            |
| rosin glyceride      | ZnO                                  | 10.23                        | 93.63            |
| rosin glyceride      | CO <sub>2</sub> pressure of 3.95 MPa | 8.45                         | 94.74            |

## 2. The pH in CO<sub>2</sub>-H<sub>2</sub>O binary system during the esterification reaction

### 2.1 CO<sub>2</sub> -H<sub>2</sub>O binary system gas–liquid equilibrium

$$\begin{cases} \hat{f}_{CO_2}^L = \hat{f}_{CO_2}^V; \hat{f}_{H_2O}^L = \hat{f}_{H_2O}^V \\ \hat{f}_i^V = py_i\phi_i^V; \hat{f}_i^L = f_ix_i\gamma_i \end{cases} \quad (2)$$

$$\begin{cases} f_{CO_2} = f_{CO_2}^H = H_{CO_2}^0(T, P_{H_2O}^S) \exp \int_{P_{H_2O}^S}^P \frac{\bar{V}_{CO_2} dP}{RT} \\ f_{H_2O} = P_{H_2O}^S \phi_{H_2O}^S \exp \int_{P_{H_2O}^S}^P \frac{\bar{V}_{H_2O} dP}{RT} \end{cases} \quad (3)$$

Here,  $\Phi_i^k$  is the fractional fugacity coefficient of component  $i$  in the  $k$ -phase (MPa),  $\hat{f}_i^k$  the fractional fugacity of component  $i$  in the  $k$ -phase (MPa),  $\gamma$  the activity coefficient,  $P$  the pressure (MPa),  $R$  the universal gas constant,  $T$  the temperature (K),  $H_{CO_2}^0(T)$  the Henry's constant of CO<sub>2</sub> at temperature  $T$  (MPa) and saturated vapor pressure of water (MPa) obtained using the model of Crovetto (1991),  $\bar{V}_i$  the partial molar volume of component  $i$  in the liquid phase (m<sup>3</sup>/mol) obtained using an empirical formula (Trew et al., 2001),  $P_{H_2O}^S$  the saturated vapor pressure of water (MPa) obtained from fitting with the Antoine formula.

For a binary  $i, j$  gas mixture, the multicomponent virial equation for the fugacity coefficient simplifies to the following.

$$\ln \phi_i = \frac{P}{RT} (B_{ii} + y_j^2 \delta_{ij}) \quad \delta_{ij} = 2B_{ij} - B_{ii} - B_{jj} \quad (4)$$

Here,  $B_{ij}$  is the second virial coefficient, which can be expressed using mixing rules proposed by Smith (1975), as below.

$$B_{ij} = \frac{(V_{ci}^{1/3} + V_{cj}^{1/3})^3}{4(Z_{ci} + Z_{cj})} \left( (0.083 - \frac{0.422}{T_r^{1.6}}) + (\frac{w_i + w_j}{2})(0.139 - \frac{0.172}{T_r^{4.2}}) \right) \quad (5)$$

$$T_{cij} = (T_{ci} T_{cj})^{0.5} (1 - k_{ij}) \quad (6)$$

Where  $V_c$  is the critical volume,  $Z_c$  the critical compressibility,  $T_r$  the reduced temperature and  $w$  the acentric factor,  $K$  is to zero in the approximate calculation.

$$\begin{cases} x = \frac{yP\phi_{CO_2}^V}{H_{CO_2}^0(T, P_{H_2O}^S) \exp(\frac{\bar{V}_{CO_2}(P_{CO_2} - P_{H_2O}^S)}{RT})} \\ 1 - y = \frac{(1-x)P_{H_2O}^S \phi_{H_2O}^S}{P\phi_{H_2O}^V} \exp(\frac{\bar{V}_{H_2O}(P - P_{H_2O}^S)}{RT}) \end{cases} \quad (7)$$

Where  $x$  and  $y$  is the mole fraction of  $CO_2$  in the liquid phase and gas phase, respectively.

## 2.2 pH values

The estimation of pH values, (that is, the estimation of  $[H^+]$  in liquid water) involves a charge-balance equation and three chemical equilibrium equations, as shown in Eqs. (8) to (11). Here,  $[N]$  represents the concentration of substance  $N$  (mol/kg) and  $[CO_2(aq)]$  represents the  $CO_2$  concentration in the liquid phase. Eq. (8) can be reduced to Eq. (12) for  $[H^+]$  by incorporating the three equilibrium constants  $K_w$ ,  $K_{a1}$  and  $K_{a2}$ . In this manner,  $[H^+]$  can be obtained using only these three equilibrium constants and  $[CO_2(aq)]$ .

The charge balance in the  $CO_2$ - $H_2O$  system provides the following relationship.

$$[H^+] = [OH^-] + [HCO_3^-] + 2[CO_3^{2-}] \quad (8)$$

In addition, the chemical equilibrium of water gives the equation below.

$$[H_2O]=[H^+]+[OH^-] \quad K_w = \frac{[H^+][OH^-]}{[H_2O]} \quad (9)$$

Finally, based on the chemical equilibrium of CO<sub>2</sub> (included the primary and secondary ionization) we can write the following.

$$[CO_2(aq)]+[H_2O]=[H^+]+[HCO_3^-] \quad K_{a1} = \frac{[H^+][HCO_3^-]}{[H_2O][CO_2(aq)]} \quad (10)$$

$$[HCO_3^-]=[H^+]+[CO_3^{2-}] \quad K_{a2} = \frac{[H^+][CO_3^{2-}]}{[HCO_3^-]} \quad (11)$$

During the actual calculation process, it was found that the carbonate ion concentration is very small, and thus the effect of this variable on pH is minimal. Calculating the pH both including and neglecting the secondary ionization, the difference is less than 0.01. For this reason, the secondary ionization can be omitted, giving the expression for [H<sup>+</sup>] concentration in Eq. (12).

$$[H^+] = \frac{K_w}{[H^+]} + \left( \frac{K_{a1}}{[H^+]} \right) [CO_2(aq)] \quad (12)$$

The following expression for [CO<sub>2</sub>(aq)] can also be employed.

$$[CO_2(aq)] = \frac{1000x}{M_w(1-x) + M_{CO_2}x} \quad (13)$$

In this work, the model proposed by Mashall and Franck (1981) was used to calculate  $K_w$ , and  $K_{a1}$  was obtained from the model of Van Walsum (2001). Subsequently, Eq. (7) was applied to determine  $x$ , after which [CO<sub>2</sub>(aq)] was obtained from Eq. (13), where  $M$  represents the molar mass of the substance in g/mol. This series of calculations requires only the reaction temperature,  $T$ , the total pressure,  $P$ , and the CO<sub>2</sub> pressure,  $P_{CO_2}$ , to be known to calculate the pH value in the liquid phase, as shown in Eq. (14).

$$pH = -\log_{10}[(K_w + K_{a1} \frac{1000x}{M_w(1-x) + M_{CO_2}x})^{0.5}] \quad (14)$$

For an example, the conditions were temperature of 270 °C, CO<sub>2</sub> pressure of 3.0 MPa and the total pressure of 4.59 MPa, and the  $x$  and  $y$  can be calculated as follow.

1 represents CO<sub>2</sub>, and 2 represents H<sub>2</sub>O.

(1) The calculation of fugacity coefficient of CO<sub>2</sub>

$$Y_1 = P_{CO_2}/P = 3/5.32 = 0.564$$

$$T_{r1} = T/T_{C1} = 543.15/304.2 = 1.7855 \quad T_{r2} = T/T_{C2} = 543.15/647.3 = 0.8391$$

$$\begin{aligned} B_{11} &= V_{C1} \times (0.083 - 0.422/T_{r1}^{1.6} + w_1(0.139 - 0.172/T_{r1}^{4.2})) / Z_{C1} \\ &= 343.0657(0.083 - 0.422/1.7855^{1.6} + 0.225(0.139 - 0.172/1.7855^{4.2})) = -19.2223 \end{aligned}$$

$$\begin{aligned} B_{22} &= V_{C2} \times (0.083 - 0.422/T_{r2}^{1.6} + w_1(0.139 - 0.172/T_{r2}^{4.2})) / Z_{C2} \\ &= 343.0657(0.083 - 0.422/0.8391^{1.6} + 0.225(0.139 - 0.172/0.8391^{4.2})) = -134.8739 \end{aligned}$$

$$T_{r12} = 543.15/(304.2 \times 647.3)^{0.5} = 1.2240$$

$$\begin{aligned} B_{12} &= (V_{C1}^{1/3} + V_{C2}^{1/3})^3 \times (0.083 - 0.422/T_{r12}^{1.6} + (w_1 + w_1)/2 \times (0.139 - 0.172/T_{r12}^{4.2})) / (4(Z_{C1} + Z_{C2})) \\ &= 291.7214(0.083 - 0.422/1.2240^{1.6} + 0.2845(0.139 - 0.172/1.2240^{4.2})) = -59.4468 \end{aligned}$$

$$\delta_{12} = 2B_{12} - B_{11} - B_{22} = 2 \times (-59.4468) + 19.2223 + 134.8739 = 35.2026$$

$$\begin{aligned} \ln \Phi_1 &= P(B_{11} + y_2^2 \delta_{12}) / RT \\ &= 4.59 \times (-19.2223 + (1 - 0.564)^2 \times 35.2026) / (8.314 \times 543.15) = -0.01476 \end{aligned}$$

Therefore, the fugacity coefficient of CO<sub>2</sub> was

$$\Phi_1 = 0.985$$

(2) The saturated vapor pressure of water

We can obtain the saturated vapor pressure and specific volume of water at different

temperatures from *the water's physical handbook*.

**Table 2** The saturated vapor pressure and specific volume of water at different temperatures.

| T/°C                                          | 250    | 260    | 270    |
|-----------------------------------------------|--------|--------|--------|
| saturated vapor pressure/MPa                  | 3.973  | 4.688  | 5.499  |
| specific volume/cm <sup>3</sup> /g            | 1.2512 | 1.2755 | 1.3023 |
| the density of water $p_w$ /g/cm <sup>3</sup> | 0.7992 | 0.7840 | 0.7679 |

(3) The calculation of partial molar volume

The partial molar volume of component  $i$  in the liquid phase  $\bar{V}_i$  ( in m<sup>3</sup>/mol) obtained using an empirical formula (Trew et al., 2001):

$$\begin{aligned}\bar{V}_1^l &= (6.20M_1 + 0.34) \times (-6.7 \times 10^{-4} \times T_{r1} + 8.1 \times 10^{-4}) / (15(1 - T_{r1})^{1.28}) \\ &= (0.00081 - 0.00067 \times 1.7855) / (15(1 - 1.7855)^{1.28}) \\ &= 0.00958 \text{ (m}^3\text{/mol)}\end{aligned}\quad (15)$$

(4) Calculation of the Henry's constant of CO<sub>2</sub> at temperature  $T$

From the model of Crovetto (1991), we can calculate the Henry's constant of CO<sub>2</sub> at saturated vapor pressure of water and high temperature.

$$\ln(H^0 / \text{bar}) = 1713.53(1 - T_r)^{1/3} (T / K)^{-1} + 3.875 + 3680.09(T / K)^{-1} - 1198506.1 \times (T / K)^{-2} \quad (16)$$

$$\begin{aligned}\ln(H^0) &= 1713.53 \times (1 - 1.7855)^{1/3} / 543.15 + 3.875 + 3680.09 / 543.15 - 1198506.1 / (543.15)^2 \\ &= 5.762 \text{ (bar)}\end{aligned}$$

Therefore, the Henry's constant of CO<sub>2</sub> at saturated vapor pressure of water can obtain

$$H^0 = 31.794 \text{ (MPa)}$$

(6) Calculation of the mole fraction of CO<sub>2</sub> in the liquid phase  $x$

$$\begin{aligned}x &= y_1 p \Phi_1 / (H^0 \exp(\bar{V}_1^l (P - P^s_2) / RT)) \\ &= 0.564 \times 5.32 \times 0.985 / (31.794 \times \exp(0.00958 \times (5.32 - 5.499) \times 10^6 / (8.314 \times 543.15)))\end{aligned}$$

$$=0.108$$

(7) Calculation of the ion product of water  $K_w$

The empirical model to calculate ion product of water developed by Marshall and Franck (1981) has the following form:

$$\log K_w = A + B/T + C/T^2 + D/T^3 + (E + F/T + G/T^2) \log \rho_w \quad (17)$$

Where  $K_w$  is ion product of water with the unit of  $(\text{mol/kg})^2$ ,  $\rho_w$  is the density of water (in  $\text{g/cm}^3$ ) (Table 2), and  $T$  is temperature in K. The parameters,  $A$ – $G$ , are listed in **Table 3**.

**Table 3** Parameters for Eq. (17)

|     |           |
|-----|-----------|
| $A$ | -4.098    |
| $B$ | -3245.2   |
| $C$ | 2.2362e+5 |
| $D$ | -3.984e+7 |
| $E$ | 13.957    |
| $F$ | -1262.3   |
| $G$ | 8.5641e+5 |

$$\begin{aligned} \text{Log } K_w &= -4.098 + (-3245.2/543.15) + (2.2362 \times 10^5 / 543.15^2) + (-3.984 \times 10^7 / 543.15^3) \\ &\quad + (13.957 + (-1262.3/543.15) + (8.5641 \times 10^5 / 543.15^2)) \times \text{LOG}_{10}(0.7679) \\ &= -11.2306 \text{ (mol/kg)}^2 \end{aligned}$$

$$\text{Therefore, } (K_w)^{1/2} = 2.425 \times 10^{-9} \text{ (mol/kg)}$$

(8) Calculation of the first dissociation constant  $K_{a1}$

In the study of Van Walsum (2001), the first dissociation constant,  $K_{a1}$ , was obtained as follow.

$$\text{p}K_{a1} = (2382.3/T) - 8.153 + 0.02194 \times T \quad (17)$$

$$\text{p}K_{a1} = (2382.3/543.15) - 8.153 + 0.02194 \times 543.15 = 8.1498$$

And then  $K_{a1}=7.083 \times 10^{-9}$

### (9) Calculation of $pH$ values

As Eq. (14), we can calculate the  $pH$  values at different conditions.

$$pH = -\log_{10}((2.4249E-09 + 7.0828E-09 \times 1000 \times 0.1576 / (18.0148 \times (1 - 0.1576) + 44.009 \times 0.1576))$$

$$= 3.70$$

Similarly, we can calculate other  $pH$  values using the same method, and the results were summarized in **Table 4**.

**Table 4** The pH values of the binary system CO<sub>2</sub>-H<sub>2</sub>O in esterification reaction.

| $P_{CO_2}/\text{MPa}$ | $P/\text{MPa}$ | $y$   | $T/^\circ\text{C}$ | $\Phi_1$ | $\bar{V}_1'$ | $x$   | $K_W$     | $K_{a1}$  | $pH$ |
|-----------------------|----------------|-------|--------------------|----------|--------------|-------|-----------|-----------|------|
| 3.0                   | 5.3            | 0.564 | 270                | 0.985    | 9.583E-03    | 0.108 | 2.425E-09 | 7.083E-09 | 3.70 |
| 4.5                   | 5.5            | 0.818 | 250                | 0.973    | 9.495E-03    | 0.140 | 2.539E-09 | 1.322E-08 | 3.53 |
| 4.5                   | 6.6            | 0.684 | 270                | 0.977    | 9.583E-03    | 0.143 | 2.425E-09 | 7.083E-09 | 3.65 |
| 3.0                   | 4.5            | 0.667 | 250                | 0.981    | 9.495E-03    | 0.102 | 2.539E-09 | 1.322E-08 | 3.58 |
| 4.5                   | 6.4            | 0.708 | 260                | 0.975    | 9.545E-03    | 0.134 | 2.500E-09 | 9.713E-09 | 3.60 |
| 6.0                   | 7.1            | 0.851 | 260                | 0.968    | 9.545E-03    | 0.166 | 2.500E-09 | 9.713E-09 | 3.56 |
| 4.5                   | 6.2            | 0.721 | 250                | 0.972    | 9.495E-03    | 0.140 | 2.539E-09 | 1.322E-08 | 3.53 |
| 3.0                   | 5.2            | 0.573 | 260                | 0.983    | 9.545E-03    | 0.113 | 2.500E-09 | 9.713E-09 | 3.63 |
| 4.5                   | 6.5            | 0.698 | 260                | 0.975    | 9.545E-03    | 0.139 | 2.500E-09 | 9.713E-09 | 3.59 |
| 6.0                   | 7.5            | 0.805 | 270                | 0.971    | 9.583E-03    | 0.186 | 2.425E-09 | 7.083E-09 | 3.61 |
| 6.0                   | 7.0            | 0.855 | 250                | 0.965    | 9.495E-03    | 0.171 | 2.539E-09 | 1.322E-08 | 3.49 |
| 4.5                   | 6.6            | 0.684 | 260                | 0.975    | 9.545E-03    | 0.139 | 2.500E-09 | 9.713E-09 | 3.59 |
| 3.0                   | 5.3            | 0.571 | 260                | 0.983    | 9.545E-03    | 0.093 | 2.500E-09 | 9.713E-09 | 3.66 |
| 6.0                   | 7.8            | 0.774 | 260                | 0.967    | 9.545E-03    | 0.184 | 2.500E-09 | 9.713E-09 | 3.55 |
| 4.5                   | 6.4            | 0.705 | 270                | 0.977    | 9.583E-03    | 0.138 | 2.425E-09 | 7.083E-09 | 3.66 |
